# Supplementary material for: A highly luminescent and stable copper halide ionic hybrid structure with an anionic CuBr2(tpp)2 module
Source: Royal Society of Chemistry journal article supplement (doi:10.1039/d1tc00205h), 2021-01-01
Supplement: d1tc00205h1.pdf [file d1tc00205h1.pdf]

# Supporting information

## A highly luminescent and stable copper halide ionic hybrid structure with anionic $\text{CuBr}_2(\text{tpp})_2$ module

Hua Tong,<sup>+a</sup> Chanchan Xu,<sup>+b</sup> and Wei Liu<sup>\*a</sup>

<sup>a</sup> School of Chemical Engineering and Technology, Sun Yat-sen University, Zhuhai, 519082, China.

<sup>b</sup> Hoffmann Institute of Advanced Materials, Shenzhen Polytechnic, 7098 Liuxian Blvd, Nanshan District, Shenzhen, 518055, China

### Materials and Characterization

**Materials.** Copper (I) bromide, triphenylphosphine, 1,4-diazabicyclo[2.2.2]octane (*ted*), benzyl bromide, acetone, toluene, dichloromethane, ethanol were purchased from Aladdin. All reagents and solvents were used without further purification unless otherwise stated.

**Synthesis of *bz-ted*.** *Ted* (1.12 g, 10 mmol) was dissolved in acetone (50 mL) upon sonication and benzyl bromide (1.71 g, 10 mmol) was added to it under magnetic stirring. A white precipitate formed in a few hours. The precipitate was collected by filtration, washed with ethyl acetate, and dried under vacuum. The yield is 79%.

**Synthesis of **1**.**  $\text{CuBr}$  (0.29 g, 0.2 mmol), *tpp* (0.5 g) and *bz-ted* (0.2 mmol) were added to a  $\text{CH}_2\text{Cl}_2$ /toluene mixture (1 : 1/v : v) and were heated at 80 °C overnight. Colorless plate-shaped crystals were filtered via vacuum filtration for further characterization. The weight of the product is 0.15 g. The reaction yield is 75 % based on Cu.

**Sample Washing and Drying.** Upon completion of reactions, a powder sample of **1** was collected by filtration from the reaction solution and washed with a small amount of acetonitrile three times. The sample was then dried in a vacuum oven overnight before other measurements were made.

**Single crystal X-ray diffraction (SXRD).** Single crystal X-ray diffraction data were collected at 203K on a Bruker APEX-II CCD with graphite-monochromated Ga K $\alpha$  radiation ( $\lambda = 1.34139 \text{ \AA}$ ) The structures were solved by direct methods and refined by full-matrix least-squares on  $F^2$  using the Bruker SHELXTL package.<sup>1</sup> These data can be obtained free of charge from The Cambridge Crystallographic Data Centre via [www.ccdc.cam.ac.uk/data\\_re-quest/cif](http://www.ccdc.cam.ac.uk/data_re-quest/cif). The structures were deposited in Cambridge Structural Database (CSD) and the number is 2013295.

**Powder X-ray diffraction (PXRD).** PXRD analyses were carried out on a Bruker D8 Advance automated diffraction system using Cu K $\alpha$ 1 radiation ( $\lambda=1.54056 \text{ \AA}$ ). The data

were collected at room temperature in a  $2\theta$  range of 3–50° with a scan speed of 1°/min. The operating power was 40 kV/40 mA.

**Optical diffuse reflectance measurements.** Optical diffuse reflectance spectra were measured at room temperature on a Shimadzu UV-3600 spectrophotometer. Data were collected in the wavelength range of 300-1200 nm. BaSO<sub>4</sub> powder was used as a standard (100% reflectance). A similar procedure as previously described was used to collect and convert the data using the Kubelka-Munk function. The scattering coefficient (S) was treated as a constant since the average particle size of the samples used in the measurements was significantly larger than 5  $\mu\text{m}$ .

**Thermogravimetric (TG) analysis.** TG analyses of the title compounds were performed on a computer-controlled TG 550 (TA Instrument). Pure powder samples were loaded into platinum pans and heated with a ramp rate of 10 °C/min from room temperature to 800 °C.

**Excitation spectrum measurements.** Excitation spectra were measured at room temperature on an FLS1000 spectrofluorometer (Edinburgh Instruments) monitored at a maximum of emission spectra.

**Photoluminescence measurements.** Steady-state photoluminescence spectra were obtained at room temperature and 77 K (liquid nitrogen was used to cool the samples) on an FLS1000 spectrofluorometer.

**Internal quantum yield measurements.** Internal quantum yield (QY) of samples in powder form was measured on a C9920-03 absolute quantum yield measurement system (Hamamatsu Photonics) with a 150 W xenon monochromatic light source and 3.3 inch integrating sphere. Sodium salicylate (99%, Merck) was used as the standard with an IQY value of 60 % when excited at 360 nm. The IQY value of the standard was measured to be 62%, indicating an experimental error of less than 5 %.

**Time-resolved photoluminescence.** Time-Resolved Emission data were collected at room temperature using the FLS1000 spectrofluorometer. The dynamics of emission decay were monitored by using the FLS1000's time-correlated single-photon counting capability (1024 channels; 10  $\mu\text{s}$  window) with data collection for 10,000 counts. Excitation was provided by an Edinburgh EPL-360 picosecond pulsed diode laser. Long lifetime measurements at 77K (1024 channels; 800  $\mu\text{s}$  window) were collected using Xe flash lamp as the excitation source. The lifetime was obtained by mono-exponential fitting.

**Density-Functional Theory (DFT) calculations.** Compound **1** is a coordination compound consisting of a complex cation and a complex anion. DFT calculations have been carried out on the cation and anion, respectively, using two different functions (M06 and B3LYP-D3). The HOMO-LUMO gap of the anion is 3.86 eV (M06) and 3.45

eV (B3LYP-D3), which are generally consistent with each other and agree with the experimental observation.

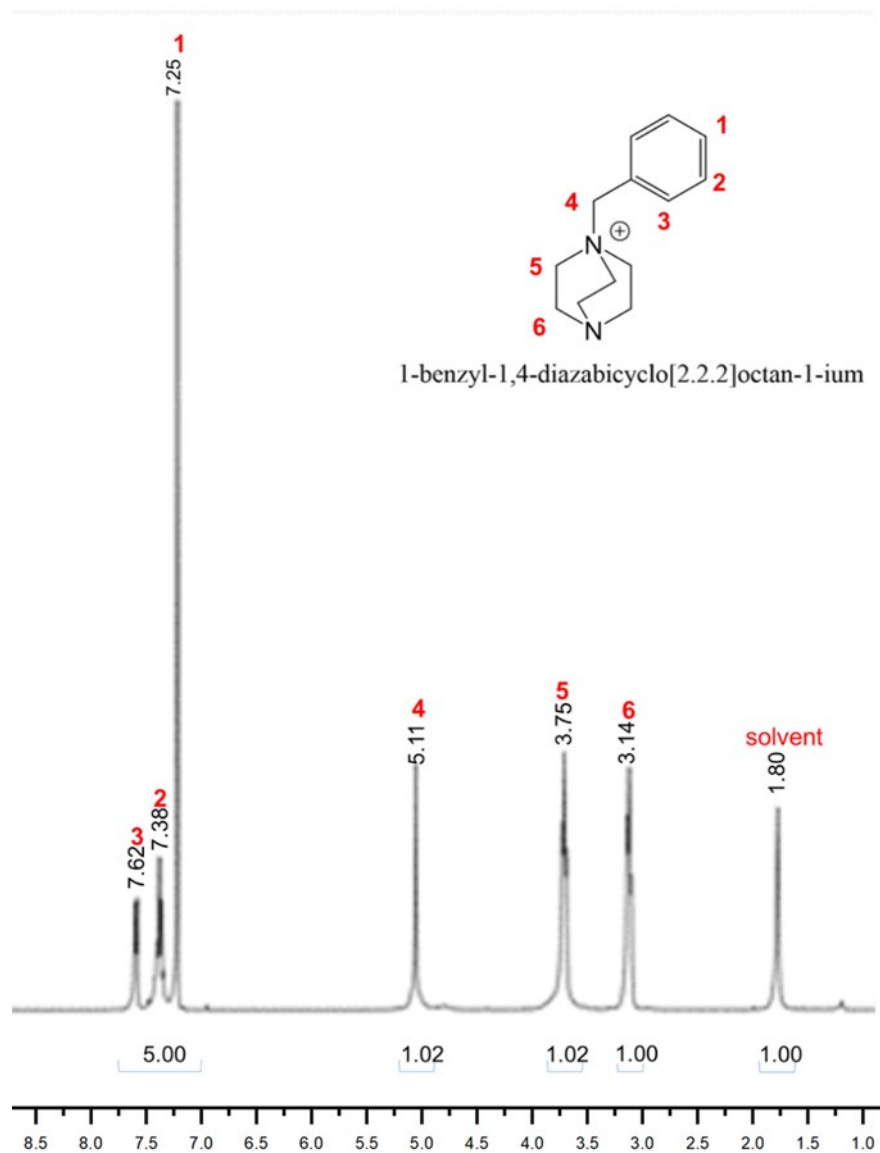

Figure S1. <sup>1</sup>H NMR spectrum of the organic ligand *bz-td*.

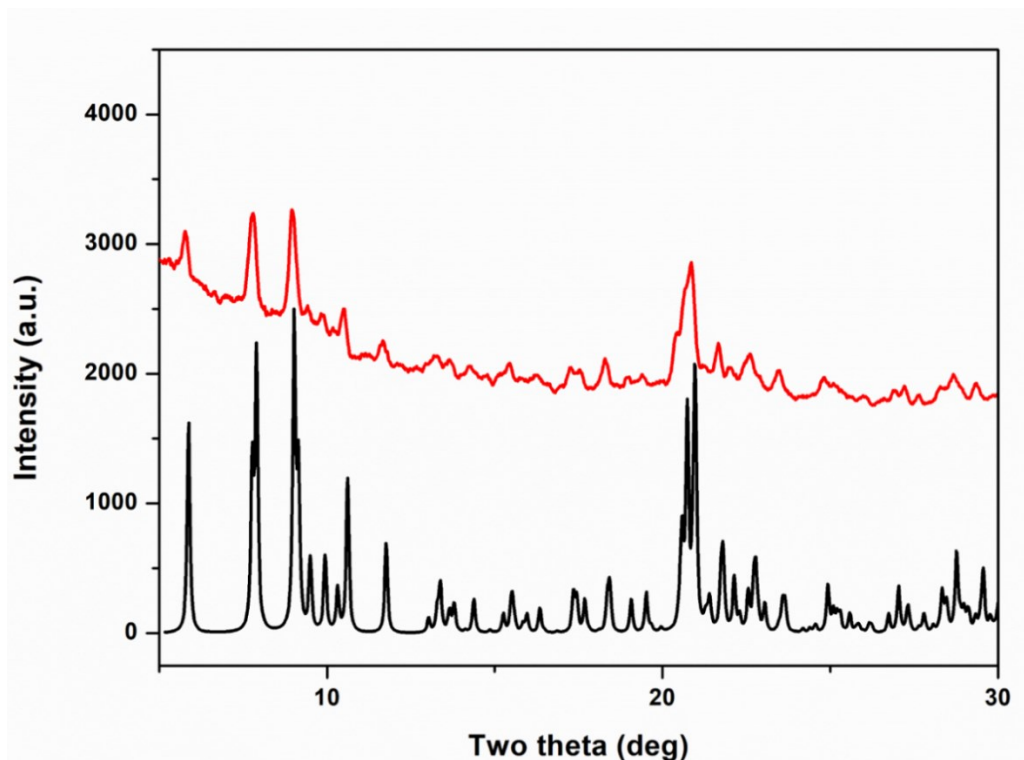

Figure S2. PXRD patterns of as-made (top) and simulated pattern of compound **1** (bottom).

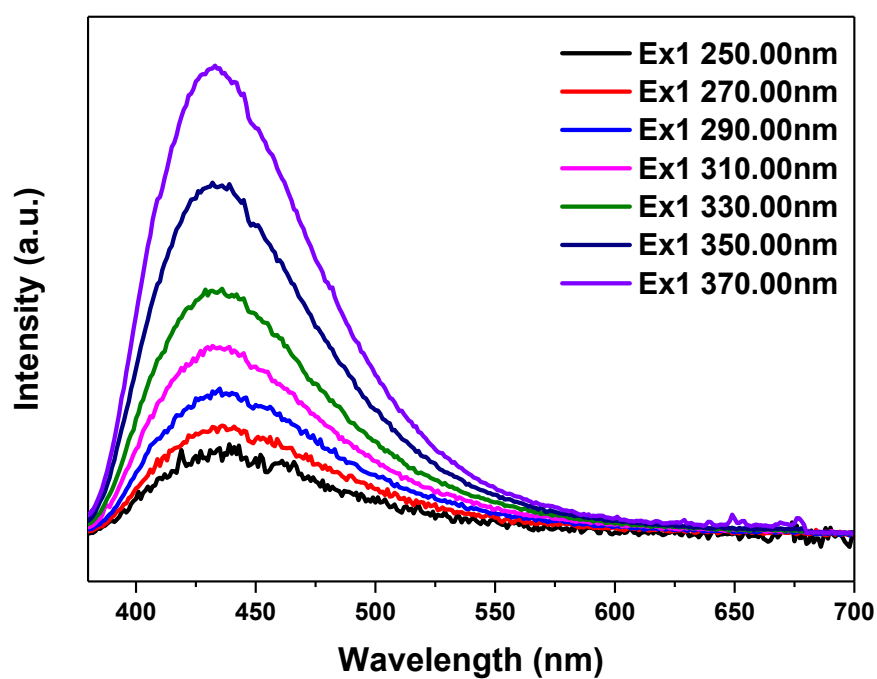

Figure S3. Emission spectra of **1** under various excitation energies.

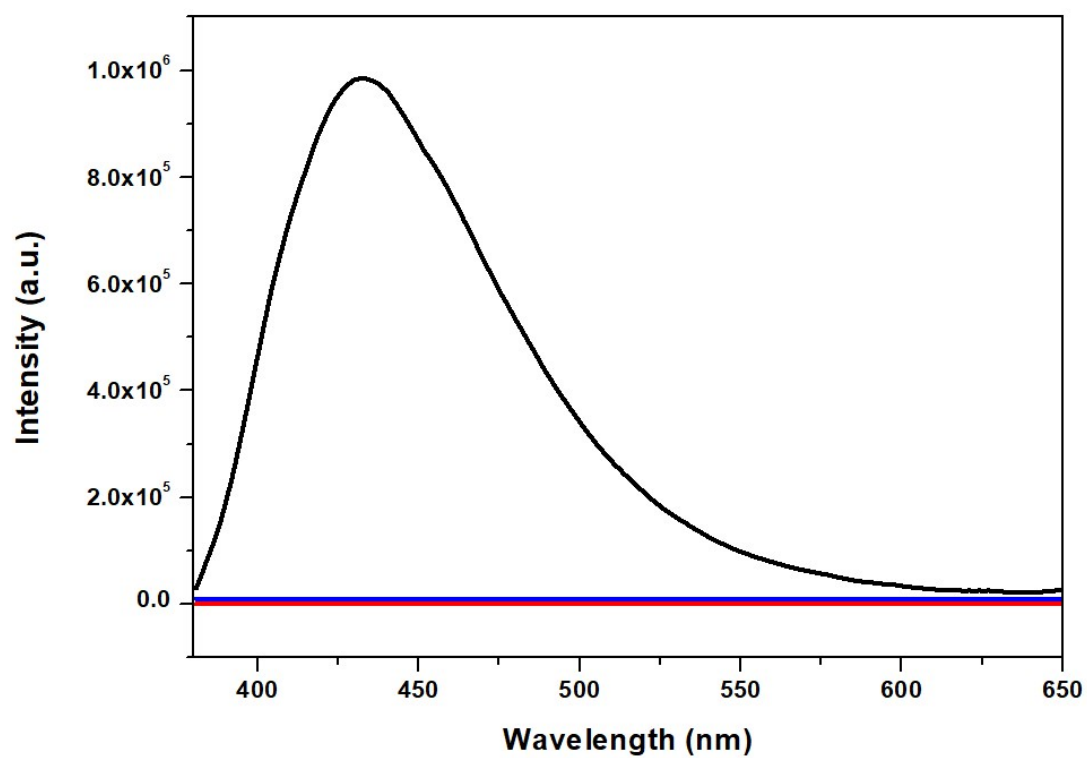

Figure S4. Emission spectra of **1** (black), *tpp* (blue) and *bz-ted* (red).  $\lambda_{\text{ex}} = 360$  nm.

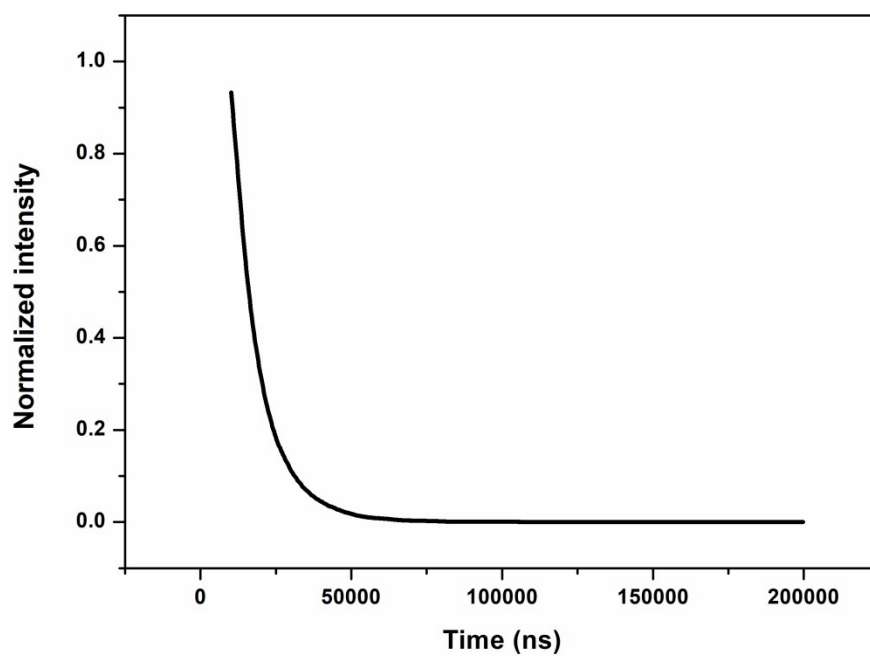

Figure S5. Luminescence decay curve at room temperature of compound **1**.

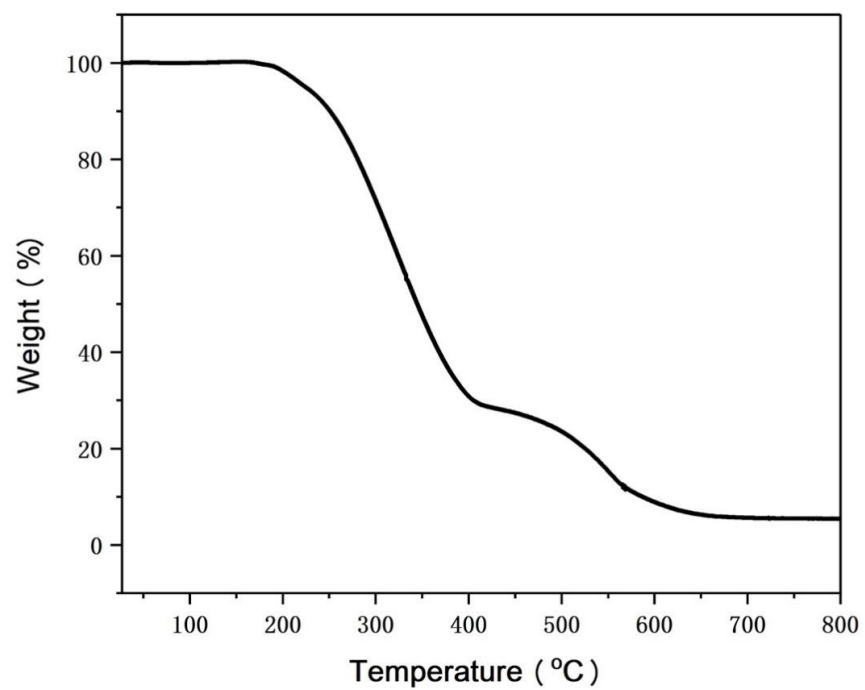

Figure S6. TGA plot of compound **1**.

Table S1. Crystal data and structure refinement details of compounds 1

|                               |                                                                                  |
|-------------------------------|----------------------------------------------------------------------------------|
| Compound                      | <b>1</b>                                                                         |
| Formula                       | C <sub>49</sub> H <sub>51</sub> Br <sub>2</sub> CuN <sub>2</sub> OP <sub>2</sub> |
| Fw                            | 969.21                                                                           |
| Space Group                   | <i>P</i> -1                                                                      |
| <i>a</i> (Å)                  | 13.1166(10)                                                                      |
| <i>b</i> (Å)                  | 13.1497(10)                                                                      |
| <i>c</i> (Å)                  | 15.2644(12)                                                                      |
| $\alpha$ (°)                  | 80.358(3)                                                                        |
| $\beta$ (°)                   | 82.951(3)                                                                        |
| $\gamma$ (°)                  | 60.542(3)                                                                        |
| <i>V</i> (Å <sup>3</sup> )    | 2257.5(3)                                                                        |
| <i>Z</i>                      | 2                                                                                |
| <i>T</i> (K)                  | 203(2)                                                                           |
| $\lambda$ (Å)                 | 1.34139                                                                          |
| $\rho$ (g·cm <sup>-3</sup> )  | 1.426                                                                            |
| $R_1^a$ [ $I > 2\sigma(I)$ ]  | 0.0397                                                                           |
| $wR_2^a$ [ $I > 2\sigma(I)$ ] | 0.0964                                                                           |
| $R_1^a$ (all data)            | 0.0334                                                                           |
| $wR_2^a$ (all data)           | 0.0923                                                                           |
| CCDC #                        | 2013295                                                                          |

$$^a R_1 = \frac{\sum ||F_o| - |F_c||}{\sum |F_o|}. \quad wR_2 = \left[ \frac{\sum w(F_o^2 - F_c^2)^2}{\sum w(F_o^2)^2} \right]^{1/2}.$$

Table S2. Elemental analysis of compound 1.

| Compound |              | C %  | H % | N % |
|----------|--------------|------|-----|-----|
|          | Calculated   | 60.7 | 5.3 | 2.9 |
|          | Experimental | 60.0 | 5.2 | 2.9 |

Table S3. Density-Functional Theory (DFT) calculation results of compound **1**.

| Species                       | Method         | B3LYP-D3 | M06  |
|-------------------------------|----------------|----------|------|
|                               | HOMO/LUMO (eV) |          |      |
| $\text{CuBr}_2(\text{tpp})^-$ |                | 3.45     | 3.86 |
| $\text{bz-ted}^+$             |                | 5.90     | 6.43 |

Table S4. A summary of recent reported blue-emitting organic-inorganic hybrid structures

| Compounds                                                                                                         | $\lambda_{\text{ex}}$ (nm) | $\lambda_{\text{em}}$ (nm) | Emission color | IQY (%) |
|-------------------------------------------------------------------------------------------------------------------|----------------------------|----------------------------|----------------|---------|
| 0D-Cu <sub>2</sub> I <sub>2</sub> (tpp) <sub>2</sub> (4-pc) <sub>2</sub> <sup>1</sup>                             | 360                        | 450                        | blue           | 86.7    |
| 0D-Cu <sub>2</sub> I <sub>2</sub> (tpp) <sub>2</sub> (3-pc) <sub>2</sub> <sup>1</sup>                             | 360                        | 455                        | blue           | 90.3    |
| 0D-Cu <sub>2</sub> I <sub>2</sub> (tpp) <sub>2</sub> (4,6-dm-pm) <sub>2</sub> <sup>1</sup>                        | 360                        | 465                        | blue           | 72.3    |
| 0D-Cu <sub>2</sub> I <sub>2</sub> (tpp) <sub>2</sub> (1-me-bzim) <sub>2</sub> <sup>1</sup>                        | 360                        | 465                        | blue           | 74.3    |
| 1D-CuI(3-pc) <sup>2</sup>                                                                                         | 360                        | 469                        | blue           | 37.2    |
| 1D-Cu <sub>2</sub> I <sub>2</sub> (tpp) <sub>2</sub> (bpp) <sub>3</sub> <sup>3</sup>                              | 360                        | 458                        | blue           | 91.7    |
| [BAPrEDA]PbCl <sub>6</sub> ·(H <sub>2</sub> O) <sub>2</sub> <sup>4</sup>                                          | 254                        | 392                        | blue-violet    | 21.3    |
| (C <sub>13</sub> H <sub>19</sub> N <sub>4</sub> ) <sub>2</sub> PbBr <sub>4</sub> <sup>5</sup>                     | 360                        | 460                        | blue           | 40      |
| Bmpip <sub>2</sub> PbBr <sub>4</sub> <sup>5</sup>                                                                 | 360                        | 470                        | blue           | 24      |
| (C <sub>9</sub> NH <sub>20</sub> ) <sub>7</sub> (PbCl <sub>4</sub> )Pb <sub>3</sub> Cl <sub>11</sub> <sup>6</sup> | 360                        | 470                        | blue           | 83      |
| K <sub>2</sub> CuCl <sub>3</sub> <sup>7</sup>                                                                     | 291                        | 392                        | blue           | 96.58   |
| K <sub>2</sub> CuBr <sub>3</sub> <sup>7</sup>                                                                     | 296                        | 388                        | blue           | 55      |
| Rb <sub>8</sub> CuSc <sub>3</sub> Cl <sub>18</sub> <sup>8</sup>                                                   | --                         | 473                        | blue           | --      |



## Reference

1. W. Liu, K. Zhu, S. J. Teat, B. J. Deibert, W. Yuan and J. Li, *J. Mater. Chem. C.*, 2017, **5**, 5962-5969.
2. X. Zhang, W. Liu, G. Z. Wei, D. Banerjee, Z. Hu and J. Li, *J. Am. Chem. Soc.*, 2014, **136**, 14230-14236.
3. W. Liu, Y. Fang, G. Z. Wei, S. J. Teat, K. Xiong, Z. Hu, W. P. Lustig and J. Li, *J. Am. Chem. Soc.*, 2015, **137**, 9400-9408.
4. C. Sun, K. Jiang, M.-F. Han, M.-J. Liu, X.-K. Lian, Y.-X. Jiang, H.-S. Shi, C.-Y. Yue and X.-W. Lei, *J. Mater. Chem. C.*, 2020, **8**, 11890-11895.
5. H. Lin, C. Zhou, M. Chaaban, L.-J. Xu, Y. Zhou, J. Neu, M. Worku, E. Berkwits, Q. He, S. Lee, X. Lin, T. Siegrist, M.-H. Du and B. Ma, *ACS Materials Lett.*, 2019, **1**, 594-598.
6. C. Zhou, H. Lin, M. Worku, J. Neu, Y. Zhou, Y. Tian, S. Lee, P. Djurovich, T. Siegrist and B. Ma, *J. Am. Chem. Soc.*, 2018, **140**, 13181-13184.
7. T. D. Creason, T. M. McWhorter, Z. Bell, M.-H. Du and B. Saporov, *Chem. Mater.*, 2020, **32**, 6197-6205.
8. J. Lin, H. Chen, J. Kang, L. N. Quan, Z. Lin, Q. Kong, M. Lai, S. Yu, L. Wang and L.-w. Wang, *Matt.*, 2019, **1**, 180-191.
